# Supplementary material for: Biogeochemical versus ecological consequences of modeled ocean physics
Source: Copernicus journal article supplement (doi:10.5194/bg-14-2877-2017), 2017-06-16
Supplement: Supplementary file 1 [file bg-14-2877-2017-supplement.pdf]

Supplement of Biogeosciences, 14, 2877–2889, 2017  
<https://doi.org/10.5194/bg-14-2877-2017-supplement>  
© Author(s) 2017. This work is distributed under  
the Creative Commons Attribution 3.0 License.

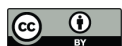

*Supplement of*

## **Biogeochemical versus ecological consequences of modeled ocean physics**

**Sophie Clayton et al.**

*Correspondence to:* Sophie Clayton ([sclayton@uw.edu](mailto:sclayton@uw.edu))

The copyright of individual parts of the supplement might differ from the CC BY 3.0 License.

## Supplementary Information

We include in this supplement, several figures showing the output of the CR simulation not included in the main text.

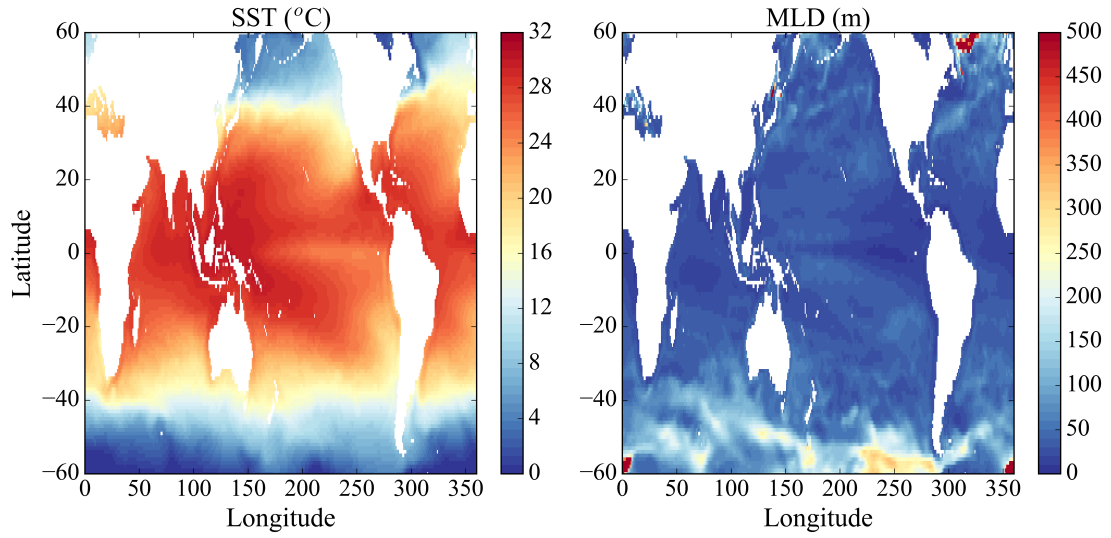

**Figure S1.** Annual average (a) sea surface temperature, and (b) mixed layer depths in the CR simulation for the 1999 model year.

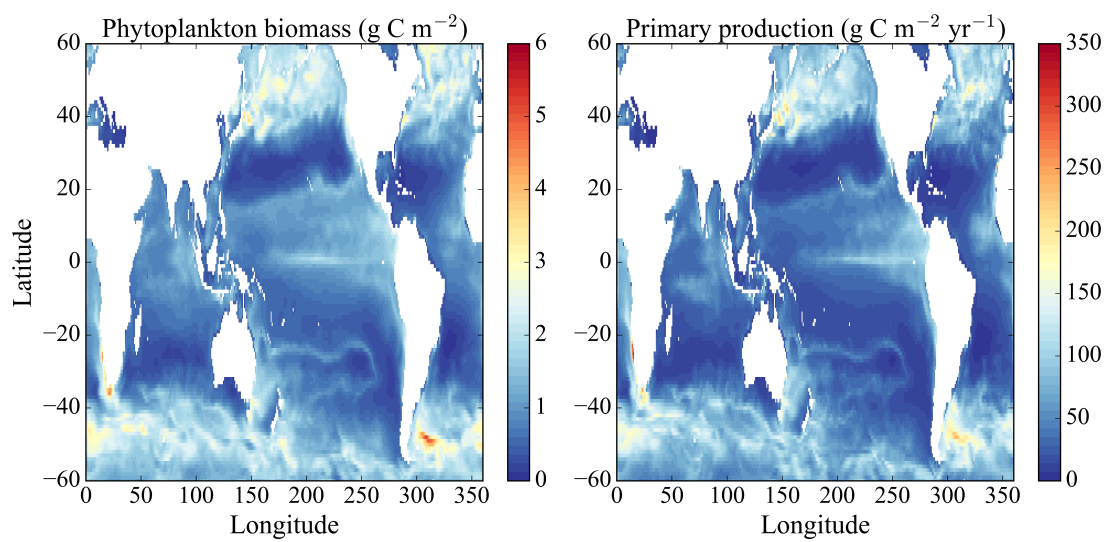

**Figure S2.** Annual average (a) phytoplankton biomass in  $\text{g C m}^{-2}$ , and (b) annual primary production in  $\text{g C m}^{-2} \text{ yr}^{-1}$  in the CR simulation for the 1999 model year.

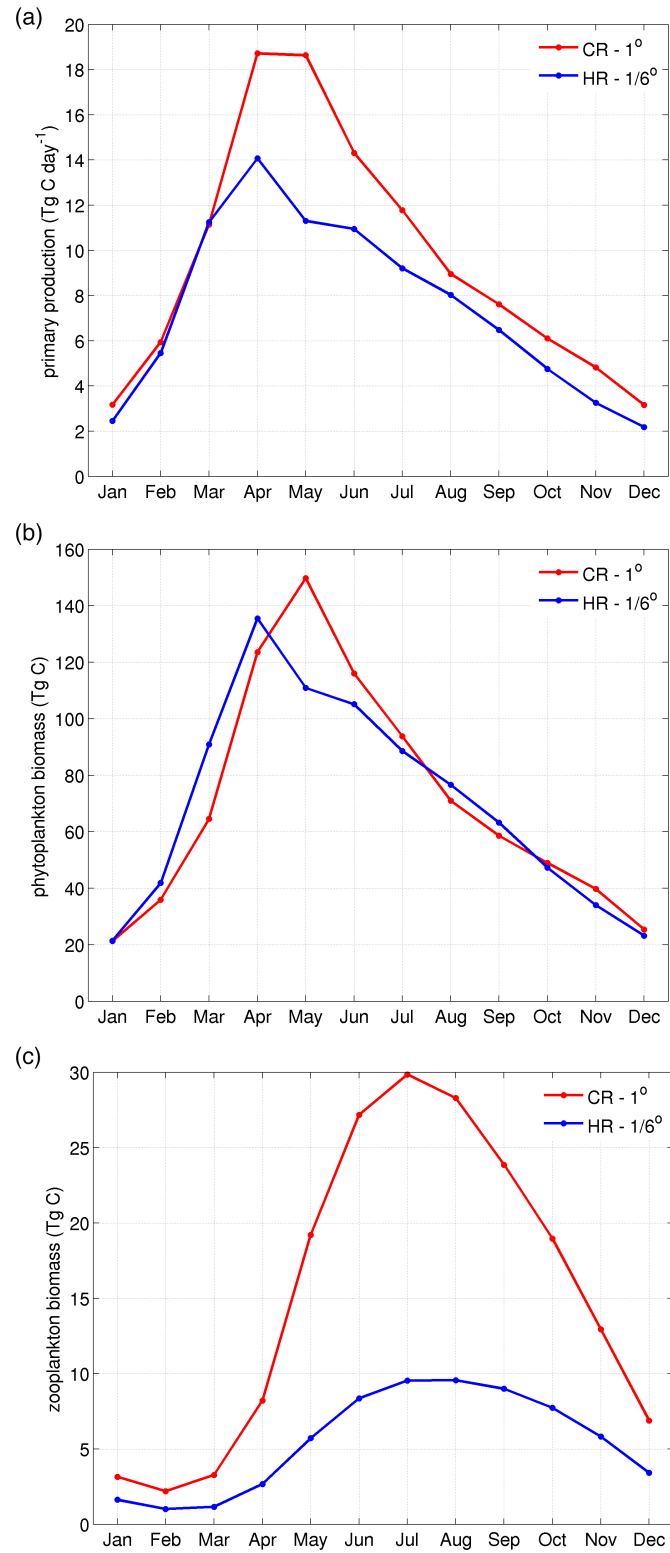

**Figure S3.** Total monthly integrated (a) primary production, (b) phytoplankton biomass and (c) zooplankton biomass for northern hemisphere ocean regions from 40°N - 60°N.
